# Supplementary material for: The Signal Transduction Protein PII Controls Ammonium, Nitrate and Urea Uptake in Cyanobacteria
Source: Front Microbiol. 2019 Jun 25;10:1428. doi: 10.3389/fmicb.2019.01428 (PMC6603209; doi:10.3389/fmicb.2019.01428)
Supplement: Supplementary file 1 [file Presentation_1.pdf]

## Supplementary Figures

### The signal transduction protein P<sub>II</sub> controls ammonium, nitrate and urea uptake in cyanobacteria

**Björn Watzer**<sup>1§</sup>, **Philipp Spät**<sup>1,2§</sup>, **Niels Neumann**<sup>1</sup>, **Moritz Koch**<sup>1</sup>, **Roman Sobotka**<sup>3</sup>, **Boris Macek**<sup>2</sup>, **Oliver Hennrich**<sup>1</sup> and **Karl Forchhammer**<sup>1\*</sup>

<sup>1</sup> Interfaculty Institute of Microbiology and Infection Medicine Tuebingen, Department of Organismic Interactions, Eberhard Karls Universität Tübingen, Tübingen 72076, Germany

<sup>2</sup> Interfaculty Institute for Cell Biology, Department of Quantitative Proteomics, Eberhard Karls Universität Tübingen, Tübingen 72076, Germany

<sup>3</sup> Centre Algatech, Institute of Microbiology, Academy of Sciences of the Czech Republic, Třeboň 379 01, Czech Republic

§ contributed equally

**\* Correspondence:**

Karl Forchhammer

karl.forchhammer@uni-tuebingen.de

## Supplementary Figure 1

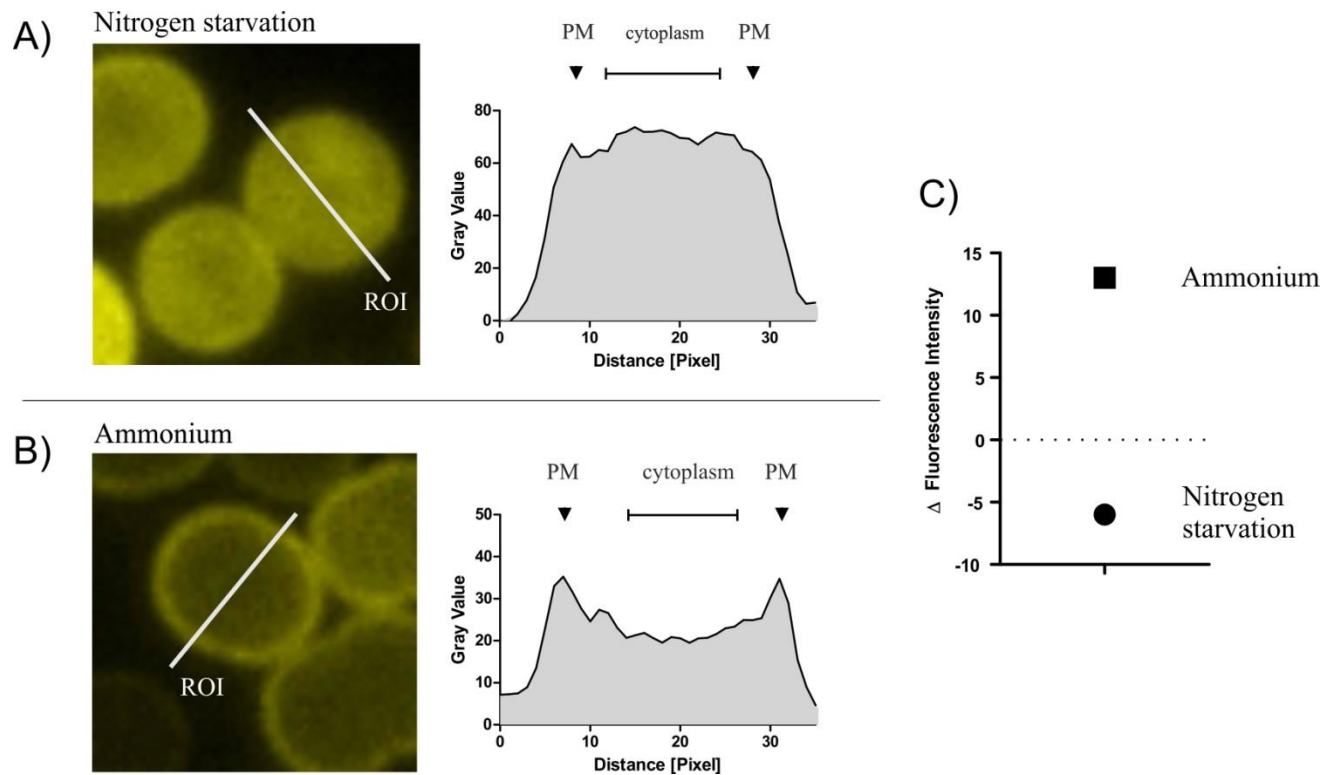

**Supplementary Figure 1:** Example of image evaluation of a nitrogen starved (A) and ammonium supplemented (B) *Synechocystis* cell. The fluorescence intensities of every pixel in a linear region of interest (ROI) across the cell were determined. The maximum gray value of the plasma membrane (PM) was subtracted from the average gray value of the cytoplasm ( $\Delta$  Fluorescence intensity). (C) shows the final representation of the  $\Delta$  Fluorescence intensity values. Values  $< 0$  indicate a stronger cytoplasmic localized signal, while values  $> 0$  show a stronger plasma membrane association.

# Supplementary Figure 2

Nitrate growth conditions

Replicate 1

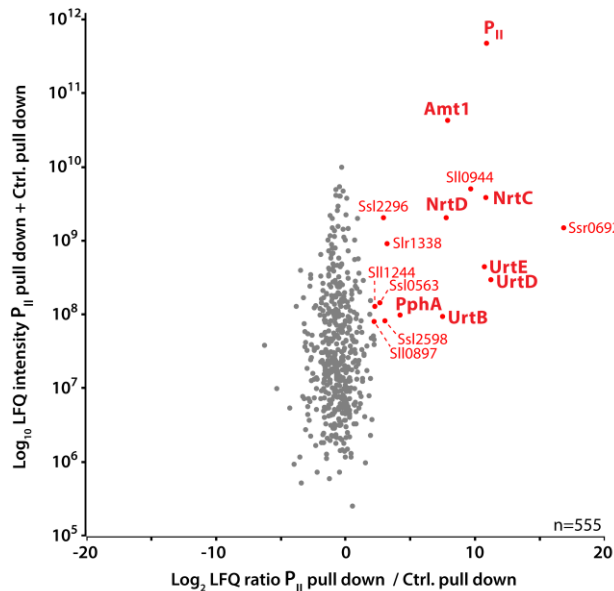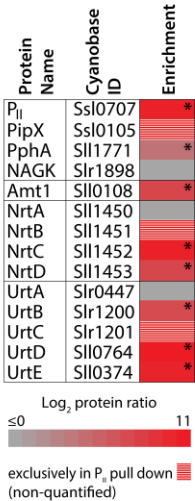

Replicate 2

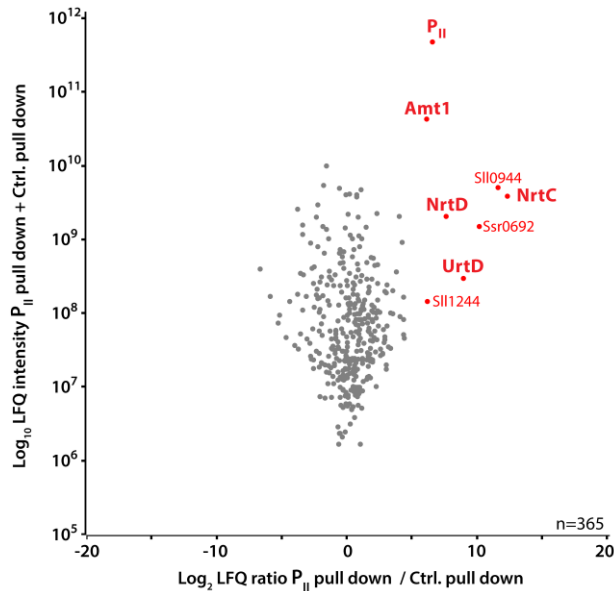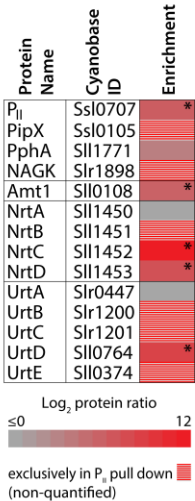

**Supplementary Figure 2:** Scatterplot of quantified proteins from two independent replicates at nitrate growth conditions (17.5 mM). Left: Log<sub>2</sub> transformed LFQ protein ratios (P<sub>II</sub>/control pull down experiment) are plotted against the log<sub>10</sub> transformed sum of protein intensities. Significant outliers in P<sub>II</sub> pull down experiments (p value=0.01) are indicated in red. Right: Heat map representation of the P<sub>II</sub>-specific enrichment of nitrogen metabolism related proteins. Log<sub>2</sub> transformed LFQ protein ratios are color coded with stars indicating significance. Proteins with missing LFQ ratios, detected exclusively in the P<sub>II</sub> but not in the control pull down, are displayed by red/grey stripes.

# Supplementary Figure 3

Urea growth conditions

Replicate 1

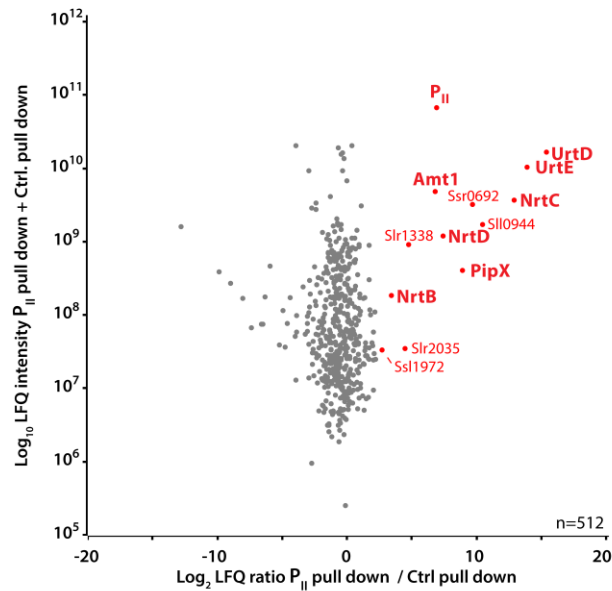

| Protein Name    | Cyanobase ID | Enrichment |
|-----------------|--------------|------------|
| P <sub>II</sub> | Ssl0707      | *          |
| PipX            | Ssl0105      | *          |
| PphA            | Sll1771      |            |
| NAGK            | Slr1898      |            |
| Amt1            | Sll0108      | *          |
| NrtA            | Sll1450      |            |
| NrtB            | Sll1451      |            |
| NrtC            | Sll1452      | *          |
| NrtD            | Sll1453      | *          |
| UrtA            | Slr0447      |            |
| UrtB            | Slr1200      |            |
| UrtC            | Slr1201      | *          |
| UrtD            | Sll0764      | *          |
| UrtE            | Sll0374      | *          |

Log<sub>2</sub> protein ratio  
≤0 15  
exclusively in P<sub>II</sub> pull down (non-quantified)

Replicate 2

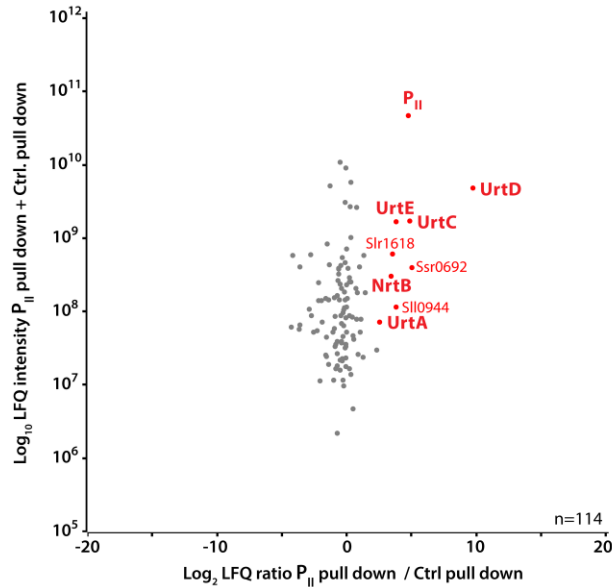

| Protein Name    | Cyanobase ID | Enrichment |
|-----------------|--------------|------------|
| P <sub>II</sub> | Ssl0707      | *          |
| PipX            | Ssl0105      |            |
| PphA            | Sll1771      | n.d.       |
| NAGK            | Slr1898      | n.d.       |
| Amt1            | Sll0108      |            |
| NrtA            | Sll1450      | n.d.       |
| NrtB            | Sll1451      | *          |
| NrtC            | Sll1452      | n.d.       |
| NrtD            | Sll1453      |            |
| UrtA            | Slr0447      | *          |
| UrtB            | Slr1200      | *          |
| UrtC            | Slr1201      | *          |
| UrtD            | Sll0764      | *          |
| UrtE            | Sll0374      | *          |

Log<sub>2</sub> protein ratio  
≤0 10  
exclusively in P<sub>II</sub> pull down (non-quantified)

**Supplementary Figure 3:** Scatterplot of quantified proteins from two independent replicates at urea growth conditions (5 mM). Left: Log<sub>2</sub> transformed LFQ protein ratios (P<sub>II</sub>/control pull down experiment) are plotted against the log<sub>10</sub> transformed sum of protein intensities. Significant outliers in P<sub>II</sub> pull down experiments (p value=0.01) are indicated in red. Right: Heat map representation of the P<sub>II</sub>-specific enrichment of nitrogen metabolism related proteins. Log<sub>2</sub> transformed LFQ protein ratios are color coded with stars indicating significance. Proteins with missing LFQ ratios, detected exclusively in the P<sub>II</sub> but not in the control pull down, are displayed by red/grey stripes, and n.d. indicates no detection in the P<sub>II</sub> and control pull down.
